# Supplementary figures and images for: Synthesis, column packing and liquid chromatography of molecularly imprinted polymers for the acid black 1, acid black 210, and acid Brown 703 dyes
Source: Royal Society of Chemistry journal article supplement (doi:10.1039/d2ra02357a), 2022-01-01

Supplementary Materials. FTIR spectrum of the dyes Acid black 1, Acid black 210, and Acid brown 703.

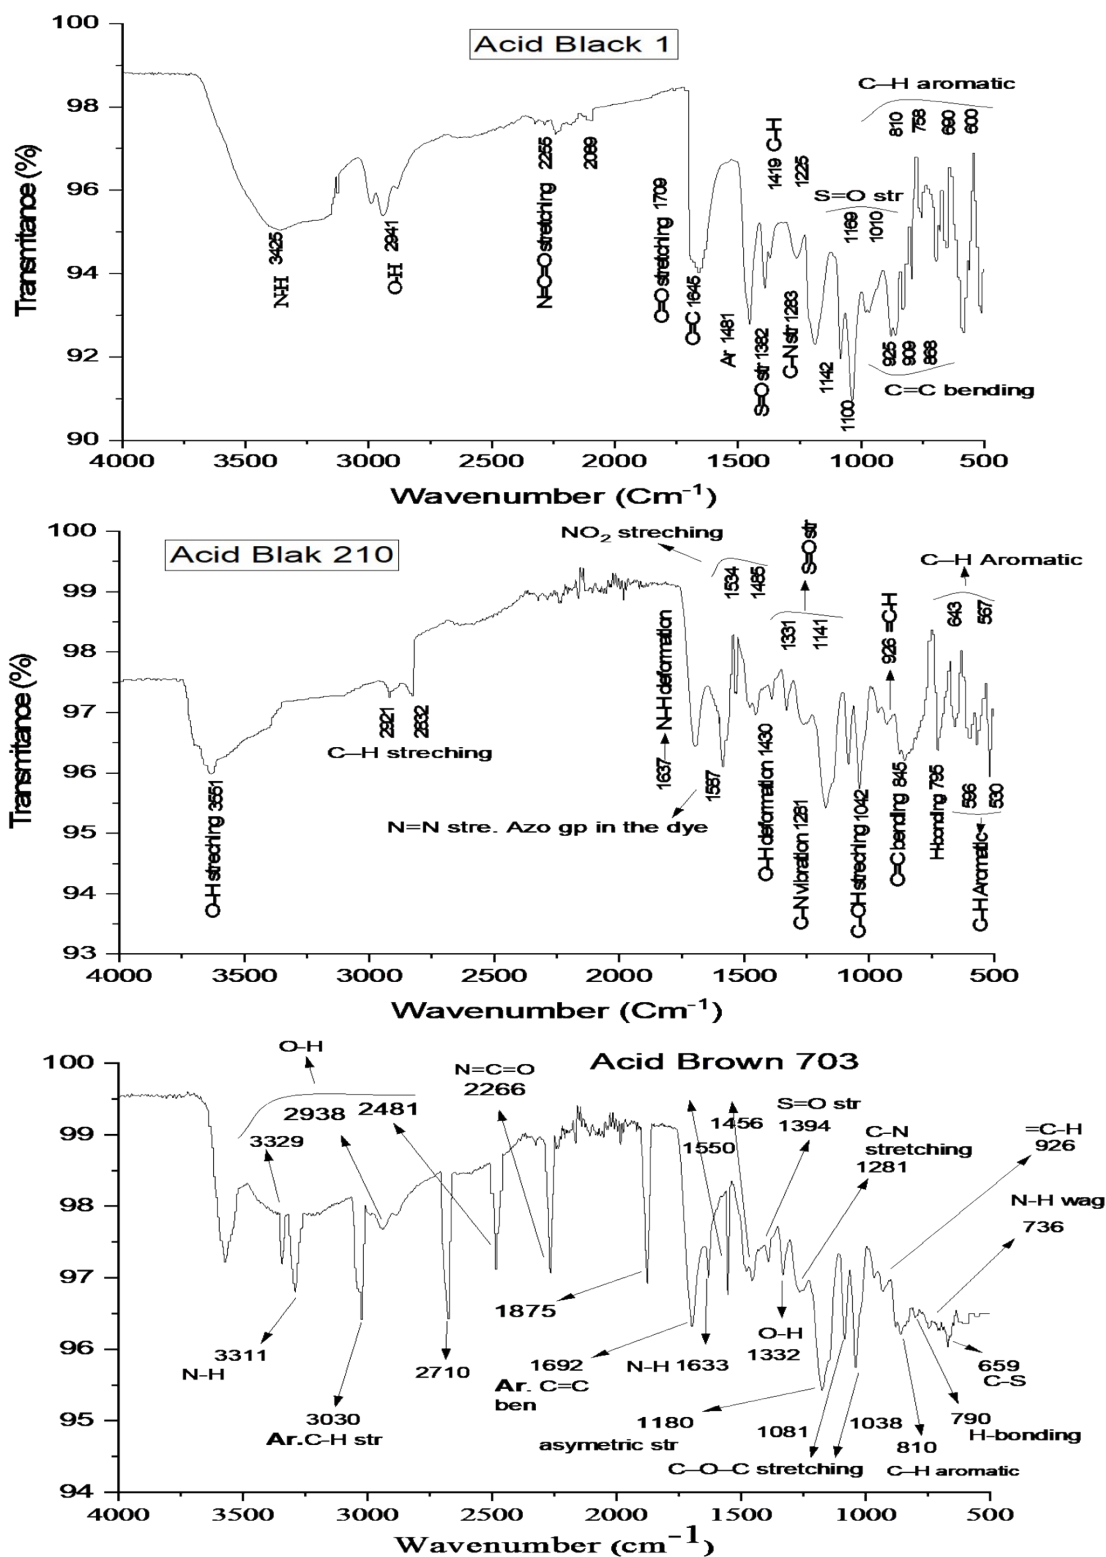

Supplement: d2ra02357a1.pdf [file d2ra02357a1.pdf]
